# Supplementary material for: N–N splitting of a functionalized µ-η1:η2coordinated N2ligand leading to a µ-nitrido µ-imido core: mechanistic insight from DFT
Source: Royal Society of Chemistry journal article supplement (doi:10.1039/b514879k), 2005-12-23
Supplement: b514879k.pdf [file b514879k.pdf]

## Supplementary Information

Table S1

| complex                    | energy [Hartree] | zero point +<br>thermal<br>correction<br>[Hartree] | entropy<br>[cal/mol K] | G [kcal/mol] | $\Delta G$<br>[kcal/mol] <sup>a</sup> |
|----------------------------|------------------|----------------------------------------------------|------------------------|--------------|---------------------------------------|
| <b>II</b>                  | -2783.56267866   | 0.386552                                           | 201.913                | -1746530.03  | 0                                     |
| <b>III</b>                 | -2782.32973149   | 0.369409                                           | 210.249                | -1745769.61  | 19.33                                 |
| <b>TS<sup>III-IV</sup></b> | -2782.31214093   | 0.368908                                           | 201.017                | -1745756.11  | 32.83                                 |
| <b>IV</b>                  | -2782.46608897   | 0.370219                                           | 212.536                | -1745855.35  | -66.41                                |
| <b>V</b>                   | -3112.56942207   | 0.423163                                           | 226.433                | -1952969.27  | -80.40                                |
| H <sub>2</sub>             | -1.17957102      | 0.013459                                           | 31.136                 | -741.09      | -                                     |
| MeSiH <sub>3</sub>         | -331.253258      | 0.066753                                           | 61.137                 | -207841.02   | -                                     |

<sup>a</sup>  $\Delta G$  relative to **II** taking into account consumed MeSiH<sub>3</sub> and produced H<sub>2</sub> molecules.
